# Supplementary material
Source: PubMed Central journal article supplement (PMC3893884)

# C14: metacaspases (E=1x10<sup>-40</sup>)

- Node color: Organism**
- ◻ protozoan parasite
  - ◻ helminth
  - ◻ animal
  - ◻ green plant
  - ◻ fungi
  - ◻ other eukaryote
  - ◻ bacteria
  - ◻ archaeobacteria
  - ◻ virus
- Node shape: Nucleophile**
- cysteine
  - △ serine
  - ◻ other

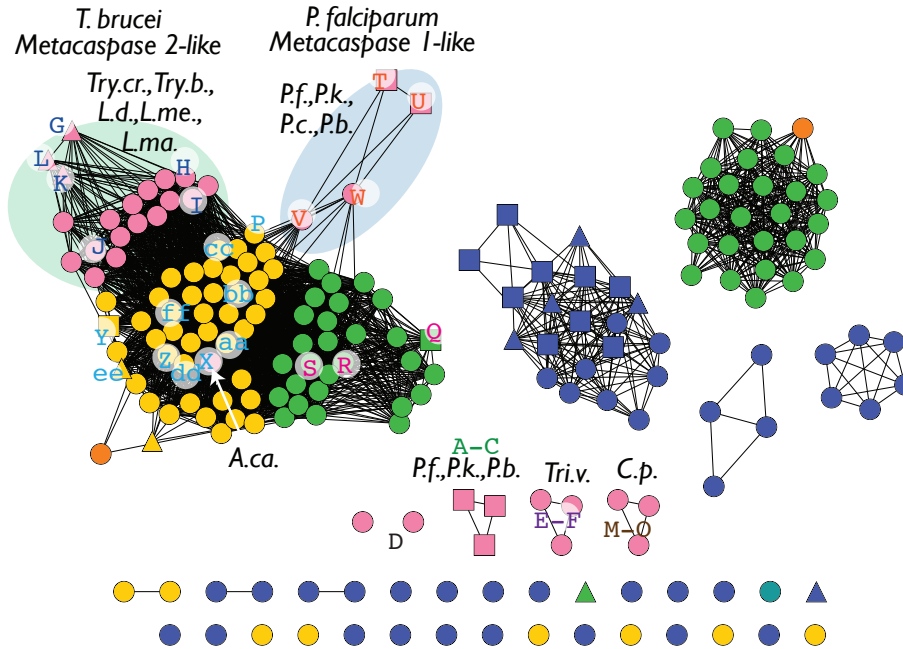

**Fig. S2. An alignment of meta-caspases illustrates the ambiguity of predicting the position of the catalytic cysteine.**

Sequences in the alignment below are labeled using letters that correspond to the location of each sequence in the SSN from Fig. 3c. A (\*) marks sequences in the alignment that have no cysteines in the general area expected to contain the nucleophile.

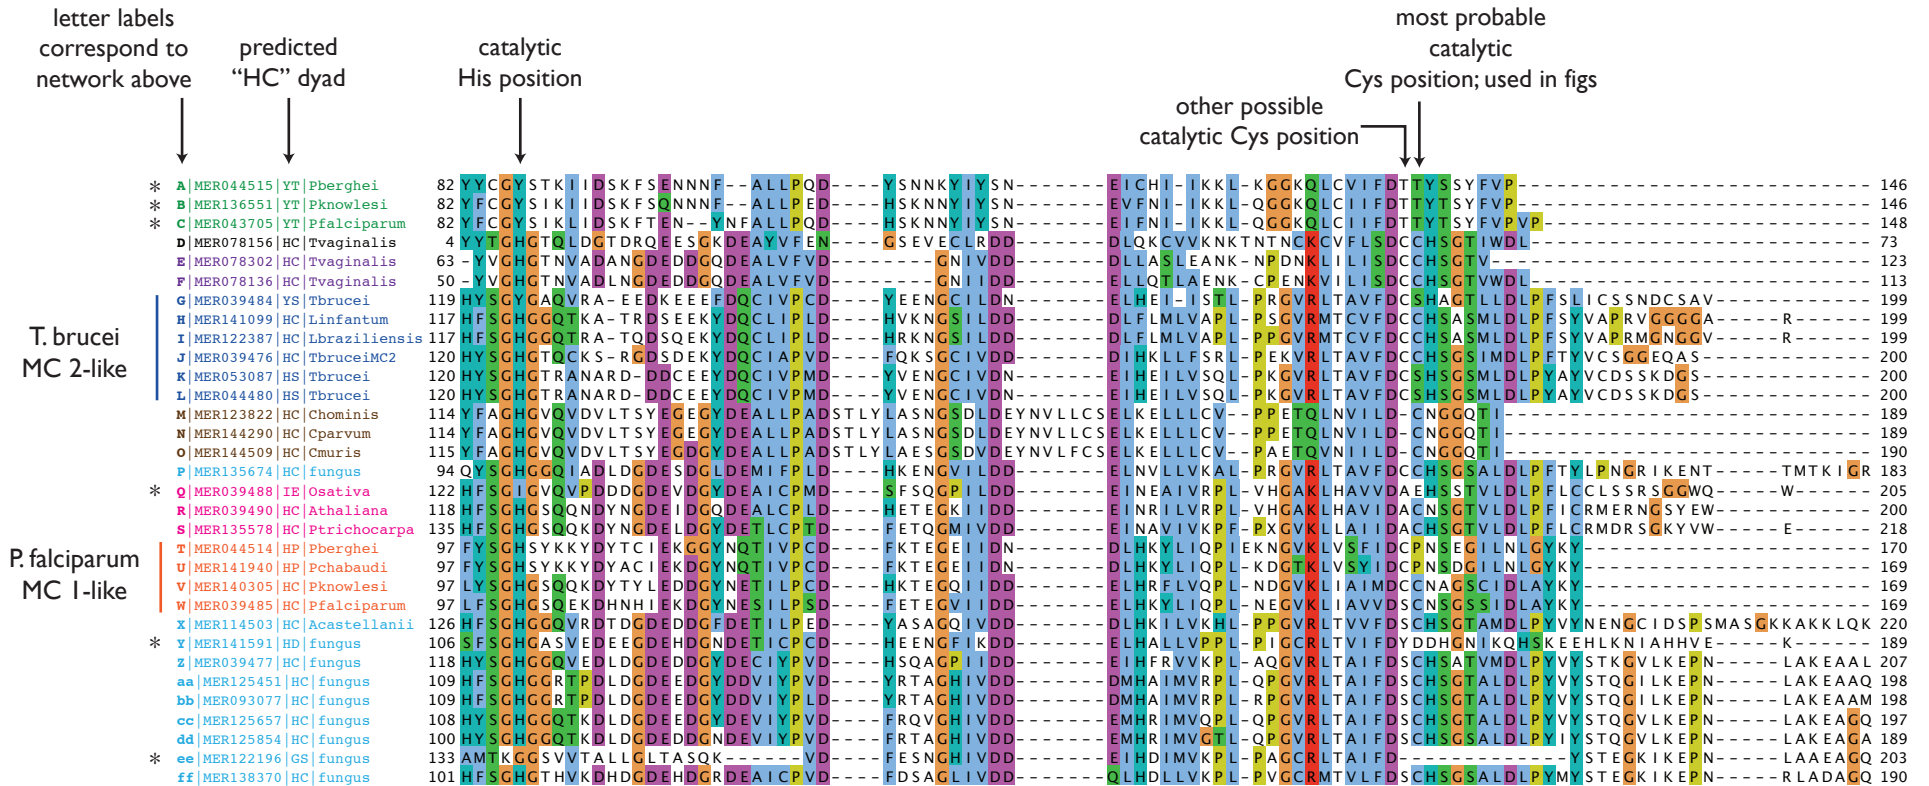

Supplement: NIHMS520174-supplement-Supp_Figure_2.pdf [file NIHMS520174-supplement-Supp_Figure_2.pdf]
